# Supplementary material
Source: Springer Nature journal article supplement (https://www.springermedizin.de/resource/supplementary/13046_2009_194_MOESM8_ESM.pdf/9661516)

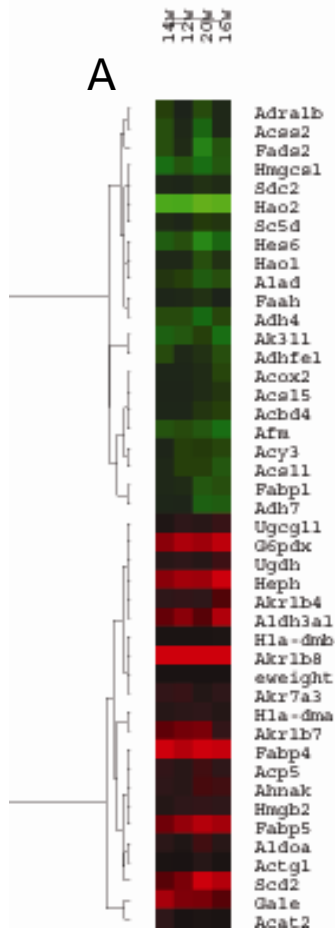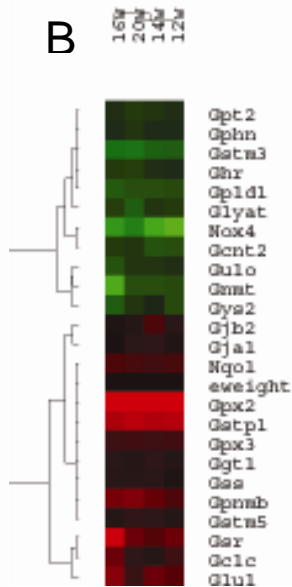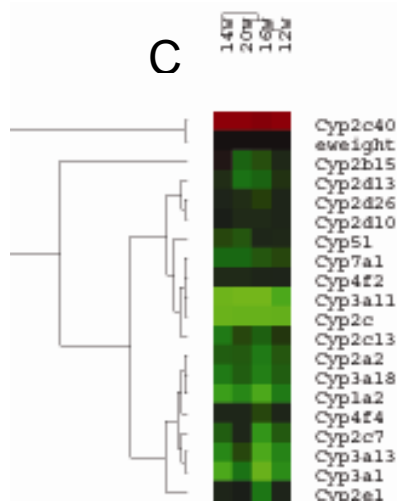

Supplement: MOESM8 [file 9661516]
